# Supplementary material
Source: publisher site journal article supplement (https://www.spandidos-publications.com/433/downloadSupplementary)

Figure S1. Immunofluorescence staining for the neutrophil marker, MPO. After the co-culture experiment *in vitro*, there were no adherent neutrophils on the surface of SCC-9 cells. (A) SCC-9 cells alone (negative control); (B) co-cultured SCC-9 cells and neutrophils; (C) co-cultured SCC-9 cells and neutrophils treated with interleukin 8; and (D) peripheral blood smear (positive control). Red staining indicates neutrophils. Scale bar, 20  $\mu$ m. MPO, myeloperoxidase.

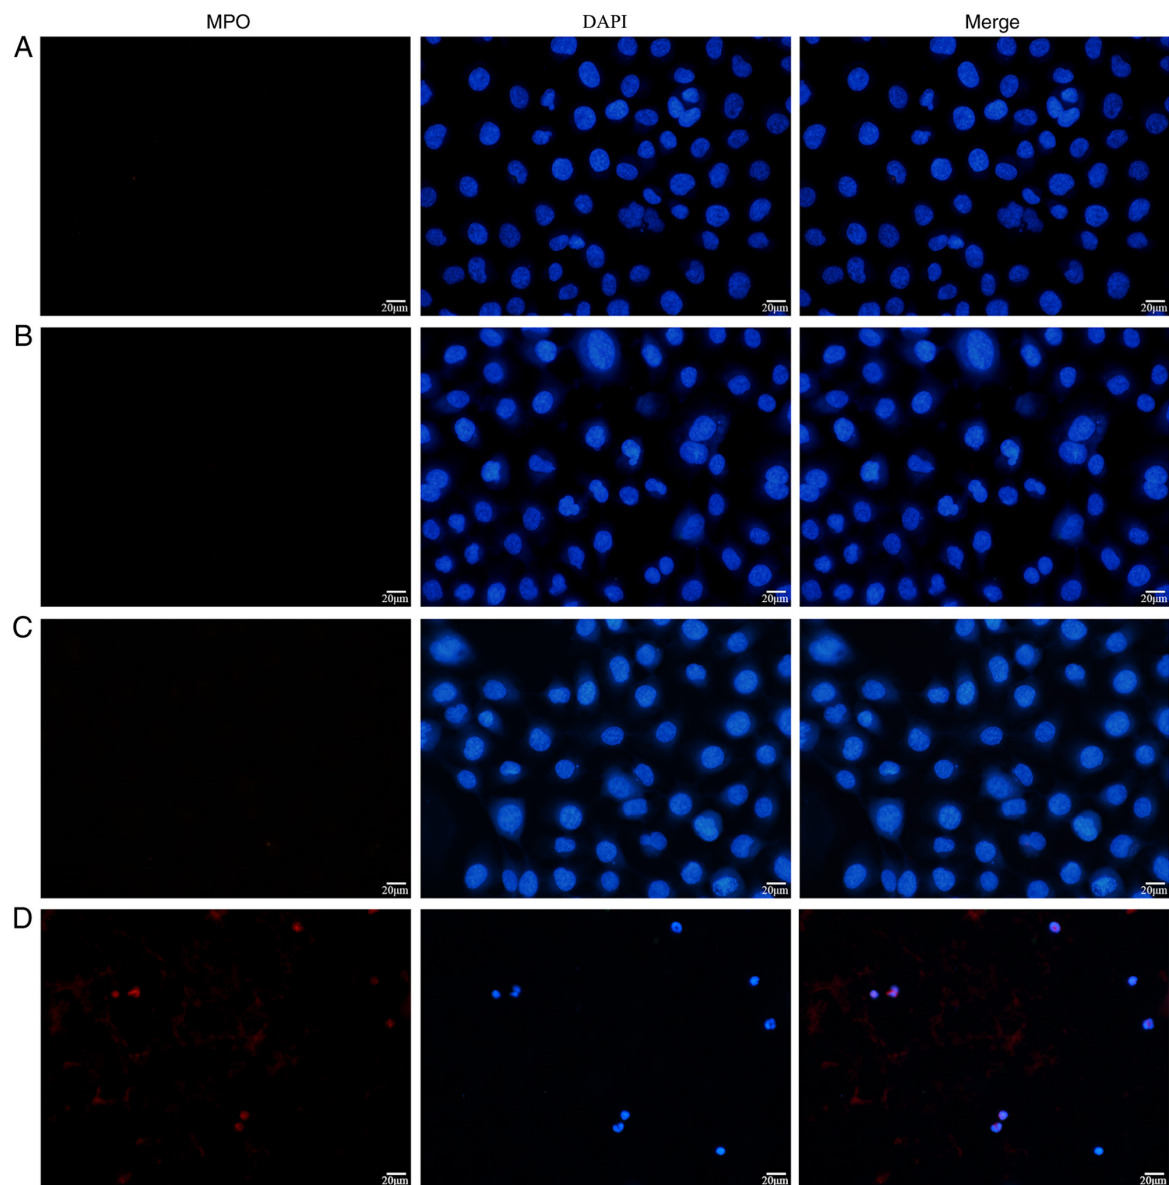

Supplement: Supplementary file 1 [file downloadSupplementary]
